# Supplementary material for: Novel Quantification of Extracellular Vesicles with Unaltered Surface Membranes Using an Internalized Oligonucleotide Tracer and Applied Pharmacokinetic Multiple Compartment Modeling
Source: PubMed Central journal article supplement (PMC8602176; doi:10.1007/s11095-021-03102-z), 2021-10-20
Supplement: 11095_2021_3102_MOESM4_ESM.pdf [file 11095_2021_3102_MOESM4_ESM.pdf]

## Table of Contents

1. 3 compartment with covariates model code
2. 3 compartment with covariates model code executed

3 compartment with covariates model code:

```
test(){
  cfMicro(A1, C1 / V, C12 / V, C12 / V2, C13 / V, C13 / V3)
  dosepoint(A1)
  C = A1 / V
  error(CEps = 0.448343)
  observe(CObs = C * (1 + CEps))
  stparm(V = tvV * exp(nV))
  stparm(V2 = tvV2 * exp(dV2dCellLinenum1*(CellLinenum==1)) *
exp(dV2dCellLinenum2*(CellLinenum==2)) * exp(nV2))
  stparm(V3 = tvV3 * exp(dV3dCellLinenum1*(CellLinenum==1)) *
exp(dV3dCellLinenum2*(CellLinenum==2)) * exp(nV3))
  stparm(C1 = tvC1 * exp(dC1dCellLinenum1*(CellLinenum==1)) *
exp(dC1dCellLinenum2*(CellLinenum==2)) * exp(nC1))
  stparm(C12 = tvC12 * exp(nC12))
  stparm(C13 = tvC13 * exp(dC13dCellLinenum1*(CellLinenum==1)) *
exp(dC13dCellLinenum2*(CellLinenum==2)) * exp(nC13))
  fcovariate(CellLinenum())
  fixef(tvV = c(, 27669.7, ))
  fixef(tvV2 = c(, 3060570, ))
  fixef(tvV3 = c(, 16001.1, ))
  fixef(tvC1 = c(, 93445, ))
  fixef(tvC12 = c(, 111078, ))
  fixef(tvC13 = c(, 21211.7, ))
  fixef(dV2dCellLinenum1(enable=c(0)) = c(, -0.0247024, ))
  fixef(dV2dCellLinenum2(enable=c(0)) = c(, -1.40195, ))
  fixef(dV3dCellLinenum1(enable=c(1)) = c(, 1.72244, ))
  fixef(dV3dCellLinenum2(enable=c(1)) = c(, 0.077768, ))
  fixef(dC1dCellLinenum1(enable=c(2)) = c(, -1.57004, ))
  fixef(dC1dCellLinenum2(enable=c(2)) = c(, -0.34285, ))
  fixef(dC13dCellLinenum1(enable=c(3)) = c(, 1.76805, ))
  fixef(dC13dCellLinenum2(enable=c(3)) = c(, 1.09156, ))
  ranef(diag(nV, nV2, nC1, nC12, nV3, nC13) = c(3.3924198E-05, 0.87921569, 0.76057715,
0.24396838, 0.0047016738, 5.3406114E-05))
}
```

3 compartment with covariates model code executed:

# Population:

ELS FOCE/general Laplace engine log file

MAX major iterations = 10  
MAX Niter (line searches per major iteration) = 1000

-----NEW MAJOR ITERATION-----

Major iteration = 1

FOCE Hessian approximation used

Model evaluation ODE level used:  
0=none

Other flags and run conditions/tolerances:

28 NSUB  
21 NUMFREEPARAM  
14 NUMFREEFIXEF  
1 NUMFREEEPS  
6 NUMFREEOMEGAPARAM  
6 NUMRANEF  
1 Allow Gaussian Fit  
5 IDENGINE  
0 IFLAGRESTART  
1 IFLAGSTDERR  
0 IFLAGNP  
1 IFLAGFOCEHESS  
1 NORDERAGQ  
1 NUMPROCS  
13 NDIGITblup  
7 NDIGITlagl  
0.200E-02 tolmodlinz  
0.100E-01 tolstderr  
100 NREP\_PCWRES  
1 NPRESAMPLE  
0 NGETMAPNP  
0 iflaganagrad  
0 iodelevelused  
1 iflagstderr  
1 iflagwhichstderr

Initial parameter values:

|                 |    |   |              |
|-----------------|----|---|--------------|
| 0.27669700E+05  | 1  | 1 | THETA        |
| 0.30605700E+07  | 2  | 1 | THETA        |
| 0.16001100E+05  | 3  | 1 | THETA        |
| 0.93445000E+05  | 4  | 1 | THETA        |
| 0.11107800E+06  | 5  | 1 | THETA        |
| 0.21211700E+05  | 6  | 1 | THETA        |
| -0.24702400E-01 | 7  | 1 | THETA        |
| -0.14019500E+01 | 8  | 1 | THETA        |
| 0.17224400E+01  | 9  | 1 | THETA        |
| 0.77768000E-01  | 10 | 1 | THETA        |
| -0.15700400E+01 | 11 | 1 | THETA        |
| -0.34285000E+00 | 12 | 1 | THETA        |
| 0.17680500E+01  | 13 | 1 | THETA        |
| 0.10915600E+01  | 14 | 1 | THETA        |
| 0.44834300E+00  | 1  | 1 | EPS_STD_DEV  |
| 0.20101145E+00  | 1  | 1 | EPS_VARIANCE |
| 0.33924198E-04  | 1  | 1 | OMEGA        |
| 0.00000000E+00  | 2  | 1 | OMEGA        |
| 0.87921569E+00  | 2  | 2 | OMEGA        |
| 0.00000000E+00  | 3  | 1 | OMEGA        |

|                 |   |            |
|-----------------|---|------------|
| 0.00000000E+00  | 3 | 2 OMEGA    |
| 0.76057715E+00  | 3 | 3 OMEGA    |
| 0.00000000E+00  | 4 | 1 OMEGA    |
| 0.00000000E+00  | 4 | 2 OMEGA    |
| 0.00000000E+00  | 4 | 3 OMEGA    |
| 0.24396838E+00  | 4 | 4 OMEGA    |
| 0.00000000E+00  | 5 | 1 OMEGA    |
| 0.00000000E+00  | 5 | 2 OMEGA    |
| 0.00000000E+00  | 5 | 3 OMEGA    |
| 0.00000000E+00  | 5 | 4 OMEGA    |
| 0.47016738E-02  | 5 | 5 OMEGA    |
| 0.00000000E+00  | 6 | 1 OMEGA    |
| 0.00000000E+00  | 6 | 2 OMEGA    |
| 0.00000000E+00  | 6 | 3 OMEGA    |
| 0.00000000E+00  | 6 | 4 OMEGA    |
| 0.00000000E+00  | 6 | 5 OMEGA    |
| 0.53406114E-04  | 6 | 6 OMEGA    |
| -0.17046089E+04 | 1 | 1 -LOGLIKE |
| -0.39219854E+04 | 1 | 1 ELSOBJ   |

Total # Subjects = 28  
Total # Observations = 279

-loglike at initial solution  
after initial stabilization = -1704.6088625882091

Main OPTIF9 optimization for engine 5 terminated  
ITRMCD exit code from OPTIF9 = 1  
1,2,3=probable success,4=maxiterations reached

Starting std error computation

-2LL Hessian inverse std error successful

| i  | internal par(i) | std. error   | rel. std. error |
|----|-----------------|--------------|-----------------|
| 1  | 0.276831E+05    | 0.223182E+04 | 0.080620        |
| 2  | 0.305655E+07    | 0.815136E+06 | 0.266685        |
| 3  | 0.160072E+05    | 0.408402E+04 | 0.255136        |
| 4  | 0.934983E+05    | 0.238597E+05 | 0.255188        |
| 5  | 0.111156E+06    | 0.133762E+05 | 0.120337        |
| 6  | 0.212235E+05    | 0.421109E+04 | 0.198417        |
| 7  | -0.247059E-01   | 0.114009E-01 | 0.461466        |
| 8  | -0.140210E+01   | 0.381477E+00 | 0.272075        |
| 9  | 0.172296E+01    | 0.270328E+00 | 0.156898        |
| 10 | 0.777273E-01    | 0.341233E-01 | 0.439013        |
| 11 | -0.156984E+01   | 0.442076E+00 | 0.281605        |
| 12 | -0.342931E+00   | 0.151701E+00 | 0.442364        |
| 13 | 0.176776E+01    | 0.247251E+00 | 0.139867        |
| 14 | 0.109080E+01    | 0.394064E+00 | 0.361263        |
| 15 | 0.448256E+00    | 0.271243E-01 | 0.060511        |
| 16 | 0.582394E-02    | 0.377574E-02 | 0.648314        |
| 17 | 0.937732E+00    | 0.160040E+00 | 0.170668        |
| 18 | 0.872024E+00    | 0.144851E+00 | 0.166109        |
| 19 | 0.493714E+00    | 0.886871E-01 | 0.179633        |
| 20 | 0.685832E-01    | 0.435955E-01 | 0.635659        |
| 21 | 0.730711E-02    | 0.512304E-02 | 0.701103        |

Standard errors of estimated parameters

| internal_coords | Param_val    | Hessinv      | Sandwich     | Score        |
|-----------------|--------------|--------------|--------------|--------------|
| 1               | 0.276831E+05 | 0.223182E+04 | 0.192395E+04 | 0.673319E+04 |
| 2               | 0.305655E+07 | 0.815136E+06 | 0.866155E+06 | 0.239797E+07 |
| 3               | 0.160072E+05 | 0.408402E+04 | 0.624424E+04 | 0.475476E+04 |

|    |               |              |              |              |
|----|---------------|--------------|--------------|--------------|
| 4  | 0.934983E+05  | 0.238597E+05 | 0.192119E+05 | 0.805001E+05 |
| 5  | 0.111156E+06  | 0.133762E+05 | 0.159945E+05 | 0.186205E+05 |
| 6  | 0.212235E+05  | 0.421109E+04 | 0.311962E+04 | 0.101803E+05 |
| 7  | -0.247059E-01 | 0.114009E-01 | 0.118292E-02 | 0.596376E+00 |
| 8  | -0.140210E+01 | 0.381477E+00 | 0.354022E+00 | 0.123236E+01 |
| 9  | 0.172296E+01  | 0.270328E+00 | 0.383587E+00 | 0.326966E+00 |
| 10 | 0.777273E-01  | 0.341233E-01 | 0.583719E-02 | 0.945907E+00 |
| 11 | -0.156984E+01 | 0.442076E+00 | 0.459944E+00 | 0.115293E+01 |
| 12 | -0.342931E+00 | 0.151701E+00 | 0.635240E-01 | 0.122391E+01 |
| 13 | 0.176776E+01  | 0.247251E+00 | 0.196924E+00 | 0.523298E+00 |
| 14 | 0.109080E+01  | 0.394064E+00 | 0.419760E+00 | 0.989361E+00 |
| 15 | 0.448256E+00  | 0.271243E-01 | 0.336418E-01 | 0.381471E-01 |
| 16 | 0.582394E-02  | 0.377574E-02 | 0.838928E-03 | 0.243198E+00 |
| 17 | 0.937732E+00  | 0.160040E+00 | 0.185836E+00 | 0.382713E+00 |
| 18 | 0.872024E+00  | 0.144851E+00 | 0.152279E+00 | 0.381116E+00 |
| 19 | 0.493714E+00  | 0.886871E-01 | 0.769431E-01 | 0.215328E+00 |
| 20 | 0.685832E-01  | 0.435955E-01 | 0.132987E-01 | 0.833214E+00 |
| 21 | 0.730711E-02  | 0.512304E-02 | 0.214727E-02 | 0.107418E+00 |

| external_coords | Param_val     | Hessinv      | Sandwich     | Score        |
|-----------------|---------------|--------------|--------------|--------------|
| 1               | 0.276831E+05  | 0.223182E+04 | 0.192395E+04 | 0.673319E+04 |
| 2               | 0.305655E+07  | 0.815136E+06 | 0.866155E+06 | 0.239797E+07 |
| 3               | 0.160072E+05  | 0.408402E+04 | 0.624424E+04 | 0.475476E+04 |
| 4               | 0.934983E+05  | 0.238597E+05 | 0.192119E+05 | 0.805001E+05 |
| 5               | 0.111156E+06  | 0.133762E+05 | 0.159945E+05 | 0.186205E+05 |
| 6               | 0.212235E+05  | 0.421109E+04 | 0.311962E+04 | 0.101803E+05 |
| 7               | -0.247059E-01 | 0.114009E-01 | 0.118292E-02 | 0.596376E+00 |
| 8               | -0.140210E+01 | 0.381477E+00 | 0.354022E+00 | 0.123236E+01 |
| 9               | 0.172296E+01  | 0.270328E+00 | 0.383587E+00 | 0.326966E+00 |
| 10              | 0.777273E-01  | 0.341233E-01 | 0.583719E-02 | 0.945907E+00 |
| 11              | -0.156984E+01 | 0.442076E+00 | 0.459944E+00 | 0.115293E+01 |
| 12              | -0.342931E+00 | 0.151701E+00 | 0.635240E-01 | 0.122391E+01 |
| 13              | 0.176776E+01  | 0.247251E+00 | 0.196924E+00 | 0.523298E+00 |
| 14              | 0.109080E+01  | 0.394064E+00 | 0.419760E+00 | 0.989361E+00 |
| 15              | 0.448256E+00  | 0.271243E-01 | 0.336418E-01 | 0.381471E-01 |
| 16              | 0.339182E-04  | 0.439794E-04 | 0.977173E-05 | 0.283274E-02 |
| 17              | 0.879341E+00  | 0.300150E+00 | 0.348528E+00 | 0.717764E+00 |
| 18              | 0.760425E+00  | 0.252626E+00 | 0.265581E+00 | 0.664684E+00 |
| 19              | 0.243753E+00  | 0.875720E-01 | 0.759757E-01 | 0.212621E+00 |
| 20              | 0.470366E-02  | 0.597984E-02 | 0.182414E-02 | 0.114289E+00 |
| 21              | 0.533939E-04  | 0.748693E-04 | 0.313806E-04 | 0.156984E-02 |

Engine Convergence Summary:  
Convergence achieved

OPTIF9 ITRMCD value on last iteration = 1  
NLME7 return code= 1

Optimal parameters:

|                 |    |   |              |         |            |           |
|-----------------|----|---|--------------|---------|------------|-----------|
| 0.27683136E+05  | 1  | 1 | THETA        | BOUNDS: | -0.100+101 | 0.100+101 |
| 0.30565508E+07  | 2  | 1 | THETA        | BOUNDS: | -0.100+101 | 0.100+101 |
| 0.16007238E+05  | 3  | 1 | THETA        | BOUNDS: | -0.100+101 | 0.100+101 |
| 0.93498288E+05  | 4  | 1 | THETA        | BOUNDS: | -0.100+101 | 0.100+101 |
| 0.11115596E+06  | 5  | 1 | THETA        | BOUNDS: | -0.100+101 | 0.100+101 |
| 0.21223484E+05  | 6  | 1 | THETA        | BOUNDS: | -0.100+101 | 0.100+101 |
| -0.24705900E-01 | 7  | 1 | THETA        | BOUNDS: | -0.100+101 | 0.100+101 |
| -0.14021015E+01 | 8  | 1 | THETA        | BOUNDS: | -0.100+101 | 0.100+101 |
| 0.17229560E+01  | 9  | 1 | THETA        | BOUNDS: | -0.100+101 | 0.100+101 |
| 0.77727348E-01  | 10 | 1 | THETA        | BOUNDS: | -0.100+101 | 0.100+101 |
| -0.15698417E+01 | 11 | 1 | THETA        | BOUNDS: | -0.100+101 | 0.100+101 |
| -0.34293142E+00 | 12 | 1 | THETA        | BOUNDS: | -0.100+101 | 0.100+101 |
| 0.17677641E+01  | 13 | 1 | THETA        | BOUNDS: | -0.100+101 | 0.100+101 |
| 0.10907973E+01  | 14 | 1 | THETA        | BOUNDS: | -0.100+101 | 0.100+101 |
| 0.44825609E+00  | 1  | 1 | EPS_STD_DEV  | BOUNDS: | 0.100E-02  | 0.100+101 |
| 0.20093352E+00  | 1  | 1 | EPS_VARIANCE |         |            |           |

|                         |   |   |          |
|-------------------------|---|---|----------|
| 0.33918246E-04          | 1 | 1 | OMEGA    |
| 0.00000000E+00          | 2 | 1 | OMEGA    |
| 0.87934107E+00          | 2 | 2 | OMEGA    |
| 0.00000000E+00          | 3 | 1 | OMEGA    |
| 0.00000000E+00          | 3 | 2 | OMEGA    |
| 0.76042537E+00          | 3 | 3 | OMEGA    |
| 0.00000000E+00          | 4 | 1 | OMEGA    |
| 0.00000000E+00          | 4 | 2 | OMEGA    |
| 0.00000000E+00          | 4 | 3 | OMEGA    |
| 0.24375324E+00          | 4 | 4 | OMEGA    |
| 0.00000000E+00          | 5 | 1 | OMEGA    |
| 0.00000000E+00          | 5 | 2 | OMEGA    |
| 0.00000000E+00          | 5 | 3 | OMEGA    |
| 0.00000000E+00          | 5 | 4 | OMEGA    |
| 0.47036575E-02          | 5 | 5 | OMEGA    |
| 0.00000000E+00          | 6 | 1 | OMEGA    |
| 0.00000000E+00          | 6 | 2 | OMEGA    |
| 0.00000000E+00          | 6 | 3 | OMEGA    |
| 0.00000000E+00          | 6 | 4 | OMEGA    |
| 0.00000000E+00          | 6 | 5 | OMEGA    |
| 0.53393923E-04          | 6 | 6 | OMEGA    |
| -0.17046094E+04         | 1 | 1 | -LOGLIKE |
| -0.39219865E+04         | 1 | 1 | ELSOBJ   |
| engine runtime (secs) = |   |   | 1.109    |
| stderr runtime (secs) = |   |   | 6.844    |

#### SHRINKAGES

|                   |   |         |
|-------------------|---|---------|
| eps-shrinkage     | = | 0.11931 |
| eta-shrinkage( 1) | = | 0.98788 |
| eta-shrinkage( 2) | = | 0.12678 |
| eta-shrinkage( 3) | = | 0.14688 |
| eta-shrinkage( 4) | = | 0.13362 |
| eta-shrinkage( 5) | = | 0.87521 |
| eta-shrinkage( 6) | = | 0.98909 |

#### RUNTIMES

|                         |       |
|-------------------------|-------|
| engine runtime (secs) = | 1.109 |
| stderr runtime (secs) = | 6.844 |

EXITCODE 1
